# Supplementary material
Source: ML conference proceedings conference paper supplement (https://proceedings.neurips.cc/paper_files/paper/2015/hash/1f50893f80d6830d62765ffad7721742-Abstract.html)
Supplement: Supplementary file [file 1f50893f80d6830d62765ffad7721742-Supplemental.zip]

## A Proof of Theorem 1

Our proof has four main parts. In Appendix A.1, we bound the regret associated with the event that our high-probability confidence intervals do not hold. In Appendix A.2, we change counted events, from partially-observed suboptimal solutions to their fully-observed prefixes. In Appendix A.3, we bound the number of times that any suboptimal prefix can be chosen instead of the optimal solution  $A^*$ . In Appendix A.4, we apply the counting argument of Kveton *et al.* [12] and finish our proof.

Let  $\mathbf{R}_t = R(\mathbf{A}_t, \mathbf{w}_t)$  be the stochastic regret of CombCascade at time  $t$ , where  $\mathbf{A}_t$  and  $\mathbf{w}_t$  are the solution and the weights of the items at time  $t$ , respectively. Let:

$$\mathcal{E}_t = \{\exists e \in E \text{ s.t. } |\bar{w}(e) - \hat{\mathbf{w}}_{\mathbf{T}_{t-1}(e)}(e)| \geq c_{t-1, \mathbf{T}_{t-1}(e)}\}$$

be the event that  $\bar{w}(e)$  is outside of the high-probability confidence interval around  $\hat{\mathbf{w}}_{\mathbf{T}_{t-1}(e)}(e)$  for at least one item  $e \in E$  at time  $t$ ; and let  $\bar{\mathcal{E}}_t$  be the complement of event  $\mathcal{E}_t$ , the event that  $\bar{w}(e)$  is in the high-probability confidence interval around  $\hat{\mathbf{w}}_{\mathbf{T}_{t-1}(e)}(e)$  for all items  $e \in E$  at time  $t$ . Then we can decompose the expected regret of CombCascade as:

$$R(n) = \mathbb{E} \left[ \sum_{t=1}^n \mathbb{1}\{\mathcal{E}_t\} \mathbf{R}_t \right] + \mathbb{E} \left[ \sum_{t=1}^n \mathbb{1}\{\bar{\mathcal{E}}_t\} \mathbf{R}_t \right]. \quad (4)$$

### A.1 Confidence Intervals Fail

The first term in (4) is easy to bound because  $\mathbf{R}_t$  is bounded and our confidence intervals hold with high probability. In particular, Hoeffding's inequality yields that for any  $e, s$ , and  $t$ :

$$P(|\bar{w}(e) - \hat{\mathbf{w}}_s(e)| \geq c_{t,s}) \leq 2 \exp[-3 \log t],$$

and therefore:

$$\begin{aligned} \mathbb{E} \left[ \sum_{t=1}^n \mathbb{1}\{\mathcal{E}_t\} \right] &\leq \sum_{e \in E} \sum_{t=1}^n \sum_{s=1}^t P(|\bar{w}(e) - \hat{\mathbf{w}}_s(e)| \geq c_{t,s}) \\ &\leq 2 \sum_{e \in E} \sum_{t=1}^n \sum_{s=1}^t \exp[-3 \log t] \leq 2 \sum_{e \in E} \sum_{t=1}^n t^{-2} \leq \frac{\pi^2}{3} L. \end{aligned}$$

Since  $\mathbf{R}_t \leq 1$ ,  $\mathbb{E} [\sum_{t=1}^n \mathbb{1}\{\mathcal{E}_t\} \mathbf{R}_t] \leq \frac{\pi^2}{3} L$ .

### A.2 From Partially-Observed Solutions to Fully-Observed Prefixes

Let  $\mathcal{H}_t = (\mathbf{A}_1, \mathbf{O}_1, \dots, \mathbf{A}_{t-1}, \mathbf{O}_{t-1}, \mathbf{A}_t)$  be the *history* of CombCascade up to choosing solution  $\mathbf{A}_t$ , the first  $t-1$  observations and  $t$  actions. Let  $\mathbb{E}[\cdot | \mathcal{H}_t]$  be the conditional expectation given this history. Then we can rewrite the expected regret at time  $t$  conditioned on  $\mathcal{H}_t$  as:

$$\mathbb{E}[\mathbf{R}_t | \mathcal{H}_t] = \mathbb{E}[\Delta_{\mathbf{A}_t} \mathbb{1}\{\Delta_{\mathbf{A}_t} > 0\} | \mathcal{H}_t] = \mathbb{E} \left[ \frac{\Delta_{\mathbf{A}_t}}{p_{\mathbf{A}_t}} \mathbb{1}\{\Delta_{\mathbf{A}_t} > 0, \mathbf{O}_t \geq |\mathbf{A}_t|\} \middle| \mathcal{H}_t \right]$$

and analyze our problem under the assumption that all items in  $\mathbf{A}_t$  are observed. This reduction is problematic because the probability  $p_{\mathbf{A}_t}$  can be low, and as a result we get a loose regret bound. To address this problem, we introduce the notion of prefixes.

Let  $A = (a_1, \dots, a_{|A|})$ . Then  $B = (a_1, \dots, a_k)$  is a *prefix* of  $A$  for any  $k \leq |A|$ . In the rest of our analysis, we treat prefixes as feasible solutions to our original problem. Let  $\mathbf{B}_t$  be a prefix of  $\mathbf{A}_t$  as defined in Lemma 1. Then  $\Delta_{\mathbf{B}_t} \geq \frac{1}{2} \Delta_{\mathbf{A}_t}$  and  $p_{\mathbf{B}_t} \geq \frac{1}{2} f^*$ , and we can bound the expected regret at time  $t$  conditioned on  $\mathcal{H}_t$  as:

$$\begin{aligned} \mathbb{E}[\mathbf{R}_t | \mathcal{H}_t] &= \mathbb{E} \left[ \frac{\Delta_{\mathbf{A}_t}}{p_{\mathbf{A}_t}} \mathbb{1}\{\Delta_{\mathbf{A}_t} > 0, \mathbf{O}_t \geq |\mathbf{A}_t|\} \middle| \mathcal{H}_t \right] \\ &\leq \frac{4}{f^*} \mathbb{E}[\Delta_{\mathbf{B}_t} \mathbb{1}\{\Delta_{\mathbf{B}_t} > 0, \mathbf{O}_t \geq |\mathbf{B}_t|\} | \mathcal{H}_t]. \end{aligned} \quad (5)$$

Now we bound the second term in (4):

$$\begin{aligned} \mathbb{E} \left[ \sum_{t=1}^n \mathbb{1}\{\bar{\mathcal{E}}_t\} \mathbf{R}_t \right] &\stackrel{(a)}{=} \sum_{t=1}^n \mathbb{E} [\mathbb{1}\{\bar{\mathcal{E}}_t\} \mathbb{E} [\mathbf{R}_t | \mathcal{H}_t]] \\ &\stackrel{(b)}{\leq} \frac{4}{f^*} \mathbb{E} \left[ \sum_{t=1}^n \Delta_{\mathbf{B}_t} \mathbb{1}\{\bar{\mathcal{E}}_t, \Delta_{\mathbf{B}_t} > 0, \mathbf{O}_t \geq |\mathbf{B}_t|\} \right]. \end{aligned} \quad (6)$$

Equality (a) is due to the tower rule and that  $\mathbb{1}\{\bar{\mathcal{E}}_t\}$  is only a function of  $\mathcal{H}_t$ . Inequality (b) follows from the upper bound in (5).

### A.3 Counting Suboptimal Prefixes

Let:

$$\mathcal{F}_t = \left\{ 2 \sum_{e \in \tilde{\mathbf{B}}_t} c_{n, \mathbf{T}_{t-1}(e)} \geq \Delta_{\mathbf{B}_t}, \Delta_{\mathbf{B}_t} > 0, \mathbf{O}_t \geq |\mathbf{B}_t| \right\} \quad (7)$$

be the event that suboptimal prefix  $\mathbf{B}_t$  is “hard to distinguish” from  $A^*$ , where  $\tilde{\mathbf{B}}_t = \mathbf{B}_t \setminus A^*$  is the set of suboptimal items in  $\mathbf{B}_t$ . The goal of this section is to bound (6) by a function of  $\mathcal{F}_t$ .

We bound  $\Delta_{\mathbf{B}_t} \mathbb{1}\{\bar{\mathcal{E}}_t, \Delta_{\mathbf{B}_t} > 0, \mathbf{O}_t \geq |\mathbf{B}_t|\}$  from above for any suboptimal prefix  $\mathbf{B}_t$ . Our bound is proved based on several facts. First,  $\mathbf{B}_t$  is a prefix of  $\mathbf{A}_t$ , and hence  $f(\mathbf{B}_t, \mathbf{U}_t) \geq f(\mathbf{A}_t, \mathbf{U}_t)$  for any  $\mathbf{U}_t$ . Second, when CombCascade chooses  $\mathbf{A}_t$ ,  $f(\mathbf{A}_t, \mathbf{U}_t) \geq f(A^*, \mathbf{U}_t)$ . It follows that:

$$\prod_{e \in \tilde{\mathbf{B}}_t} \mathbf{U}_t(e) = f(\mathbf{B}_t, \mathbf{U}_t) \geq f(\mathbf{A}_t, \mathbf{U}_t) \geq f(A^*, \mathbf{U}_t) = \prod_{e \in A^*} \mathbf{U}_t(e).$$

Now we divide both sides by  $\prod_{e \in A^* \cap \mathbf{B}_t} \mathbf{U}_t(e)$ :

$$\prod_{e \in \tilde{\mathbf{B}}_t} \mathbf{U}_t(e) \geq \prod_{e \in A^* \setminus \mathbf{B}_t} \mathbf{U}_t(e)$$

and substitute the definitions of the UCBs from (3):

$$\prod_{e \in \tilde{\mathbf{B}}_t} \min \{ \hat{\mathbf{w}}_{\mathbf{T}_{t-1}(e)}(e) + c_{t-1, \mathbf{T}_{t-1}(e)}, 1 \} \geq \prod_{e \in A^* \setminus \mathbf{B}_t} \min \{ \hat{\mathbf{w}}_{\mathbf{T}_{t-1}(e)}(e) + c_{t-1, \mathbf{T}_{t-1}(e)}, 1 \}.$$

Since  $\bar{\mathcal{E}}_t$  happens,  $|\bar{w}(e) - \hat{\mathbf{w}}_{\mathbf{T}_{t-1}(e)}(e)| < c_{t-1, \mathbf{T}_{t-1}(e)}$  for all  $e \in E$  and therefore:

$$\begin{aligned} \prod_{e \in A^* \setminus \mathbf{B}_t} \min \{ \hat{\mathbf{w}}_{\mathbf{T}_{t-1}(e)}(e) + c_{t-1, \mathbf{T}_{t-1}(e)}, 1 \} &\geq \prod_{e \in A^* \setminus \mathbf{B}_t} \bar{w}(e) \\ \prod_{e \in \tilde{\mathbf{B}}_t} \min \{ \hat{\mathbf{w}}_{\mathbf{T}_{t-1}(e)}(e) + c_{t-1, \mathbf{T}_{t-1}(e)}, 1 \} &\leq \prod_{e \in \tilde{\mathbf{B}}_t} \min \{ \bar{w}(e) + 2c_{t-1, \mathbf{T}_{t-1}(e)}, 1 \}. \end{aligned}$$

By Lemma 2:

$$\prod_{e \in \tilde{\mathbf{B}}_t} \min \{ \bar{w}(e) + 2c_{t-1, \mathbf{T}_{t-1}(e)}, 1 \} \leq \prod_{e \in \tilde{\mathbf{B}}_t} \bar{w}(e) + 2 \sum_{e \in \tilde{\mathbf{B}}_t} c_{t-1, \mathbf{T}_{t-1}(e)}.$$

Finally, we chain the last four inequalities and get:

$$\prod_{e \in \tilde{\mathbf{B}}_t} \bar{w}(e) + 2 \sum_{e \in \tilde{\mathbf{B}}_t} c_{t-1, \mathbf{T}_{t-1}(e)} \geq \prod_{e \in A^* \setminus \mathbf{B}_t} \bar{w}(e),$$

which further implies that:

$$\begin{aligned} 2 \sum_{e \in \tilde{\mathbf{B}}_t} c_{t-1, \mathbf{T}_{t-1}(e)} &\geq \prod_{e \in A^* \setminus \mathbf{B}_t} \bar{w}(e) - \prod_{e \in \tilde{\mathbf{B}}_t} \bar{w}(e) \\ &\geq \underbrace{\prod_{e \in A^* \cap \mathbf{B}_t} \bar{w}(e)}_{\leq 1} \left[ \prod_{e \in A^* \setminus \mathbf{B}_t} \bar{w}(e) - \prod_{e \in \tilde{\mathbf{B}}_t} \bar{w}(e) \right] \\ &= \Delta_{\mathbf{B}_t}. \end{aligned}$$

Since  $c_{n, \mathbf{T}_{t-1}(e)} \geq c_{t-1, \mathbf{T}_{t-1}(e)}$  for any time  $t \leq n$ , the event  $\mathcal{F}_t$  in (7) happens. Therefore, we can bound the right-hand side in (6) as:

$$\mathbb{E} \left[ \sum_{t=1}^n \Delta_{\mathbf{B}_t} \mathbb{1}\{\bar{\mathcal{E}}_t, \Delta_{\mathbf{B}_t} > 0, \mathbf{O}_t \geq |\mathbf{B}_t|\} \right] \leq \mathbb{E} [\hat{\mathbf{R}}(n)] ,$$

where:

$$\hat{\mathbf{R}}(n) = \sum_{t=1}^n \Delta_{\mathbf{B}_t} \mathbb{1}\{\mathcal{F}_t\} . \quad (8)$$

#### A.4 CombUCB1 Analysis of Kveton *et al.* [12]

It remains to bound  $\hat{\mathbf{R}}(n)$  in (8). Note that the event  $\mathcal{F}_t$  can happen only if the weights of all items in  $\mathbf{B}_t$  are observed. As a result,  $\hat{\mathbf{R}}(n)$  can be bounded as in stochastic combinatorial semi-bandits. The key idea of our proof is to introduce infinitely-many mutually-exclusive events and then bound the number of times that these events happen when a suboptimal prefix is chosen [12]. The event  $i$  at time  $t$  is:

$$\begin{aligned} G_{i,t} = & \{ \text{less than } \beta_1 K \text{ items in } \tilde{\mathbf{B}}_t \text{ were observed at most } \alpha_1 \frac{K^2}{\Delta_{\tilde{\mathbf{B}}_t}^2} \log n \text{ times,} \\ & \dots, \\ & \text{less than } \beta_{i-1} K \text{ items in } \tilde{\mathbf{B}}_t \text{ were observed at most } \alpha_{i-1} \frac{K^2}{\Delta_{\tilde{\mathbf{B}}_t}^2} \log n \text{ times,} \\ & \text{at least } \beta_i K \text{ items in } \tilde{\mathbf{B}}_t \text{ were observed at most } \alpha_i \frac{K^2}{\Delta_{\tilde{\mathbf{B}}_t}^2} \log n \text{ times,} \\ & \mathbf{O}_t \geq |\mathbf{B}_t| \} , \end{aligned}$$

where we assume that  $\Delta_{\mathbf{B}_t} > 0$ ; and the constants  $(\alpha_i)$  and  $(\beta_i)$  are defined as:

$$\begin{aligned} 1 = \beta_0 > \beta_1 > \beta_2 > \dots > \beta_k > \dots \\ \alpha_1 > \alpha_2 > \dots > \alpha_k > \dots , \end{aligned}$$

and satisfy  $\lim_{i \rightarrow \infty} \alpha_i = \lim_{i \rightarrow \infty} \beta_i = 0$ . By Lemma 3 of Kveton *et al.* [12],  $G_{i,t}$  are exhaustive at any time  $t$  when  $(\alpha_i)$  and  $(\beta_i)$  satisfy:

$$\sqrt{6} \sum_{i=1}^{\infty} \frac{\beta_{i-1} - \beta_i}{\sqrt{\alpha_i}} \leq 1 .$$

In this case:

$$\hat{\mathbf{R}}(n) = \sum_{t=1}^n \Delta_{\mathbf{B}_t} \mathbb{1}\{\mathcal{F}_t\} = \sum_{i=1}^{\infty} \sum_{t=1}^n \Delta_{\mathbf{B}_t} \mathbb{1}\{G_{i,t}, \Delta_{\mathbf{B}_t} > 0\} .$$

Now we introduce item-specific variants of events  $G_{i,t}$  and associate the regret at time  $t$  with these events. In particular, let:

$$G_{e,i,t} = G_{i,t} \cap \left\{ e \in \tilde{\mathbf{B}}_t, \mathbf{T}_{t-1}(e) \leq \alpha_i \frac{K^2}{\Delta_{\tilde{\mathbf{B}}_t}^2} \log n \right\}$$

be the event that item  $e$  is not observed “sufficiently often” under event  $G_{i,t}$ . Then it follows that:

$$\mathbb{1}\{G_{i,t}, \Delta_{\mathbf{B}_t} > 0\} \leq \frac{1}{\beta_i K} \sum_{e \in \tilde{E}} \mathbb{1}\{G_{e,i,t}, \Delta_{\mathbf{B}_t} > 0\}$$

because at least  $\beta_i K$  items are not observed “sufficiently often” under event  $G_{i,t}$ . Therefore, we can bound  $\hat{\mathbf{R}}(n)$  as:

$$\hat{\mathbf{R}}(n) \leq \sum_{e \in \tilde{E}} \sum_{i=1}^{\infty} \sum_{t=1}^n \mathbb{1}\{G_{e,i,t}, \Delta_{\mathbf{B}_t} > 0\} \frac{\Delta_{\mathbf{B}_t}}{\beta_i K} .$$

Let each item  $e$  be in  $N_e$  suboptimal prefixes and  $\Delta_{e,1} \geq \dots \geq \Delta_{e,N_e}$  be the gaps of these prefixes, ordered from the largest gap to the smallest. Then  $\hat{\mathbf{R}}(n)$  can be further bounded as:

$$\begin{aligned}
\hat{\mathbf{R}}(n) &\leq \sum_{e \in \tilde{E}} \sum_{i=1}^{\infty} \sum_{t=1}^n \sum_{k=1}^{N_e} \mathbb{1}\{G_{e,i,t}, \Delta_{\mathbf{B}_t} = \Delta_{e,k}\} \frac{\Delta_{e,k}}{\beta_i K} \\
&\stackrel{(a)}{\leq} \sum_{e \in \tilde{E}} \sum_{i=1}^{\infty} \sum_{t=1}^n \sum_{k=1}^{N_e} \mathbb{1}\left\{e \in \tilde{\mathbf{B}}_t, \mathbf{T}_{t-1}(e) \leq \alpha_i \frac{K^2}{\Delta_{e,k}^2} \log n, \Delta_{\mathbf{B}_t} = \Delta_{e,k}, \mathbf{O}_t \geq |\mathbf{B}_t|\right\} \frac{\Delta_{e,k}}{\beta_i K} \\
&\stackrel{(b)}{\leq} \sum_{e \in \tilde{E}} \sum_{i=1}^{\infty} \frac{\alpha_i K \log n}{\beta_i} \left[ \Delta_{e,1} \frac{1}{\Delta_{e,1}^2} + \sum_{k=2}^{N_e} \Delta_{e,k} \left( \frac{1}{\Delta_{e,k}^2} - \frac{1}{\Delta_{e,k-1}^2} \right) \right] \\
&\stackrel{(c)}{<} \sum_{e \in \tilde{E}} \sum_{i=1}^{\infty} \frac{\alpha_i K \log n}{\beta_i} \frac{2}{\Delta_{e,N_e}} \\
&= \sum_{e \in \tilde{E}} K \frac{2}{\Delta_{e,N_e}} \left[ \sum_{i=1}^{\infty} \frac{\alpha_i}{\beta_i} \right] \log n,
\end{aligned}$$

where inequality (a) follows from the definition of  $G_{e,i,t}$  and inequality (b) is from solving:

$$\max_{A_{1:n}, O_{1:n}} \sum_{t=1}^n \sum_{k=1}^{N_e} \mathbb{1}\left\{e \in \tilde{B}_t, T_{t-1}^{A_{1:n}, O_{1:n}}(e) \leq \alpha_i \frac{K^2}{\Delta_{e,k}^2} \log n, \Delta_{B_t} = \Delta_{e,k}, O_t \geq |B_t|\right\} \frac{\Delta_{e,k}}{\beta_i K},$$

where  $A_{1:n} = (A_1, \dots, A_n)$  is a sequence of  $n$  solutions,  $O_{1:n} = (O_1, \dots, O_n)$  is a sequence of  $n$  observations,  $T_t^{A_{1:n}, O_{1:n}}(e)$  is the number of times that item  $e$  is observed in  $t$  steps under  $A_{1:n}$  and  $O_{1:n}$ ,  $B_t$  is the prefix of  $A_t$  as defined in Lemma 1, and  $\tilde{B}_t = B_t \setminus A^*$ . Inequality (c) is by Lemma 3 of Kveton *et al.* [11]:

$$\left[ \Delta_{e,1} \frac{1}{\Delta_{e,1}^2} + \sum_{k=2}^{N_e} \Delta_{e,k} \left( \frac{1}{\Delta_{e,k}^2} - \frac{1}{\Delta_{e,k-1}^2} \right) \right] < \frac{2}{\Delta_{e,N_e}}.$$

For the same  $(\alpha_i)$  and  $(\beta_i)$  as in Theorem 4 of Kveton *et al.* [12],  $\sum_{i=1}^{\infty} \frac{\alpha_i}{\beta_i} < 267$ . Moreover, since  $\Delta_{\mathbf{B}_t} \geq \frac{1}{2} \Delta_{\mathbf{A}_t}$  for any solution  $\mathbf{A}_t$  and its prefix  $\mathbf{B}_t$ , we have  $\Delta_{e,N_e} \geq \frac{1}{2} \Delta_{e,\min}$ . Now we chain all inequalities and get:

$$R(n) \leq \frac{4}{f^*} \mathbb{E} [\hat{\mathbf{R}}(n)] + \frac{\pi^2}{3} L \leq \frac{K}{f^*} \sum_{e \in \tilde{E}} \frac{4272}{\Delta_{e,\min}} \log n + \frac{\pi^2}{3} L.$$

## B Proof of Theorem 2

The key idea is to decompose the regret of CombCascade into two parts, where the gaps  $\Delta_{\mathbf{A}_t}$  are at most  $\epsilon$  and larger than  $\epsilon$ . In particular, note that for any  $\epsilon > 0$ :

$$R(n) = \mathbb{E} \left[ \sum_{t=1}^n \mathbb{1}\{\Delta_{\mathbf{A}_t} \leq \epsilon\} \mathbf{R}_t \right] + \mathbb{E} \left[ \sum_{t=1}^n \mathbb{1}\{\Delta_{\mathbf{A}_t} > \epsilon\} \mathbf{R}_t \right]. \quad (9)$$

The first term in (9) can be bounded trivially as:

$$\mathbb{E} \left[ \sum_{t=1}^n \mathbb{1}\{\Delta_{\mathbf{A}_t} \leq \epsilon\} \mathbf{R}_t \right] = \mathbb{E} \left[ \sum_{t=1}^n \Delta_{\mathbf{A}_t} \mathbb{1}\{\Delta_{\mathbf{A}_t} \leq \epsilon, \Delta_{\mathbf{A}_t} > 0\} \right] \leq \epsilon n$$

because  $\Delta_{\mathbf{A}_t} \leq \epsilon$ . The second term in (9) can be bounded in the same way as  $R(n)$  in Theorem 1. The only difference is that  $\Delta_{e,\min} \geq \epsilon$  for all  $e \in \tilde{E}$ . Therefore:

$$\mathbb{E} \left[ \sum_{t=1}^n \mathbb{1}\{\Delta_{\mathbf{A}_t} > \epsilon\} \mathbf{R}_t \right] \leq \frac{K}{f^*} \sum_{e \in \tilde{E}} \frac{4272}{\Delta_{e,\min}} \log n + \frac{\pi^2}{3} L \leq \frac{4272KL}{f^* \epsilon} \log n + \frac{\pi^2}{3} L.$$

Now we chain all inequalities and get:

$$R(n) \leq \frac{4272KL}{f^* \epsilon} \log n + \epsilon n + \frac{\pi^2}{3} L.$$

Finally, we choose  $\epsilon = \sqrt{\frac{4272KL \log n}{f^* n}}$  and get:

$$R(n) \leq 2\sqrt{4272} \sqrt{\frac{KL n \log n}{f^*}} + \frac{\pi^2}{3} L < 131 \sqrt{\frac{KL n \log n}{f^*}} + \frac{\pi^2}{3} L,$$

which concludes our proof.

## C Technical Lemmas

**Lemma 1.** *Let  $A = (a_1, \dots, a_{|A|}) \in \Theta$  be a feasible solution and  $B_k = (a_1, \dots, a_k)$  be a prefix of  $k \leq |A|$  items of  $A$ . Then  $k$  can be set such that  $\Delta_{B_k} \geq \frac{1}{2} \Delta_A$  and  $p_{B_k} \geq \frac{1}{2} f^*$ .*

*Proof.* We consider two cases. First, suppose that  $f(A, \bar{w}) \geq \frac{1}{2} f^*$ . Then our claims hold trivially for  $k = |A|$ . Now suppose that  $f(A, \bar{w}) < \frac{1}{2} f^*$ . Then we choose  $k$  such that:

$$f(B_k, \bar{w}) \leq \frac{1}{2} f^* \leq p_{B_k}.$$

Such  $k$  is guaranteed to exist because  $\bigcup_{i=1}^{|A|} [f(B_i, \bar{w}), p_{B_i}] = [f(A, \bar{w}), 1]$ , which follows from the facts that  $f(B_i, \bar{w}) = p_{B_i} \bar{w}(a_i)$  for any  $i \leq |A|$  and  $p_{B_1} = 1$ . We prove that  $\Delta_{B_k} \geq \frac{1}{2} \Delta_A$  as:

$$\Delta_{B_k} = f^* - f(B_k, \bar{w}) \geq \frac{1}{2} f^* \geq \frac{1}{2} \Delta_A.$$

The first inequality is by our assumption and the second one holds for any solution  $A$ . ■

**Lemma 2.** *Let  $0 \leq p_1, \dots, p_K \leq 1$  and  $u_1, \dots, u_K \geq 0$ . Then:*

$$\prod_{k=1}^K \min\{p_k + u_k, 1\} \leq \prod_{k=1}^K p_k + \sum_{k=1}^K u_k.$$

*This bound is tight when  $p_1, \dots, p_K = 1$  and  $u_1, \dots, u_K = 0$ .*

*Proof.* The proof is by induction on  $K$ . Our claim clearly holds when  $K = 1$ . Now choose  $K > 1$  and suppose that our claim holds for any  $0 \leq p_1, \dots, p_{K-1} \leq 1$  and  $u_1, \dots, u_{K-1} \geq 0$ . Then:

$$\begin{aligned} \prod_{k=1}^K \min\{p_k + u_k, 1\} &= \min\{p_K + u_K, 1\} \prod_{k=1}^{K-1} \min\{p_k + u_k, 1\} \\ &\leq \min\{p_K + u_K, 1\} \left( \prod_{k=1}^{K-1} p_k + \sum_{k=1}^{K-1} u_k \right) \\ &\leq p_K \prod_{k=1}^{K-1} p_k + u_K \underbrace{\prod_{k=1}^{K-1} p_k}_{\leq 1} + \underbrace{\min\{p_K + u_K, 1\}}_{\leq 1} \sum_{k=1}^{K-1} u_k \\ &\leq \prod_{k=1}^K p_k + \sum_{k=1}^K u_k. \end{aligned}$$

■
